# Supplementary material for: The genetic basis of natural variation in the timing of vegetative phase change inArabidopsis thaliana
Source: Oxford University Press journal article supplement (doi:10.1242/dev.200321), 2022-05-03
Supplement: dev200321supp.pdf [file dev200321supp.pdf]

Figure S1

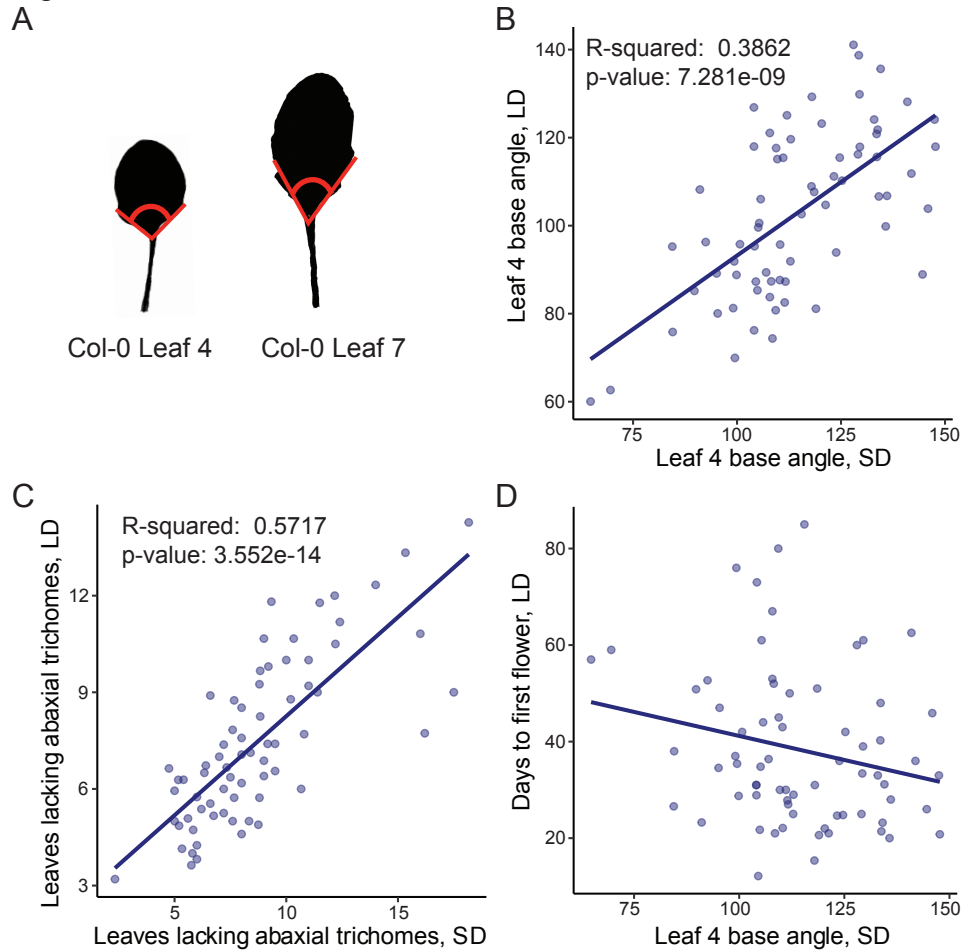

**Fig. S1. Relationship between vegetative traits and flowering time in SD and LD.**

(A) Leaves four and seven of the Col-0 accession, with measures of leaf base angle indicated in red.

(B) Correlation between leaf four base angle in LD and SD conditions.

(C) Correlation between leaves lacking abaxial trichomes in SD and leaves lacking abaxial trichomes in LD conditions.

(D) Correlation between leaf four base angle in SD and days to opening of first flower in LD conditions. Blue lines shown are linear regression model;  $R^2$  and  $p$ -values from linear regression analysis displayed in upper right corner of each panel.

Figure S2

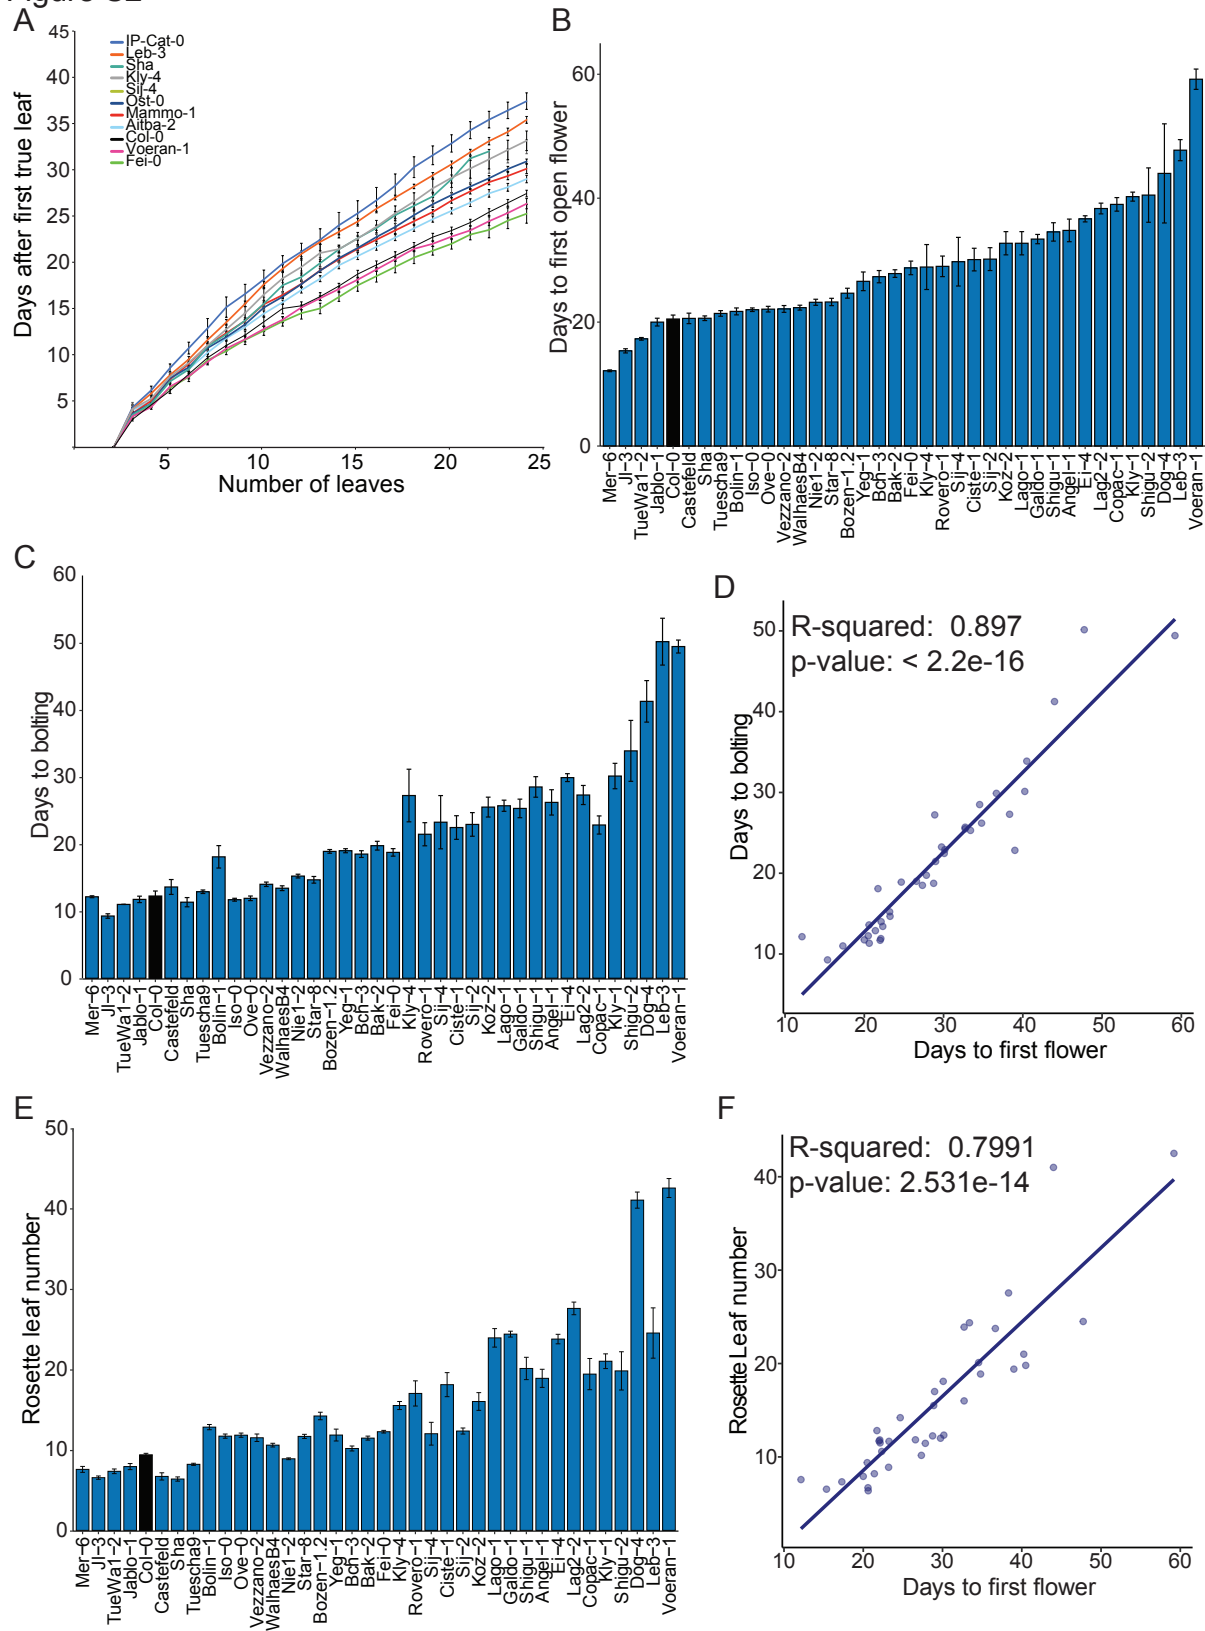

**Fig. S2. Assessment of reproductive phase transition for scoring timing of timing of reproductive phase transition in natural accessions.**

(A) Rate of leaf initiation in a group of selected accessions. Data show number of visible leaves and days after the appearance of first true leaves.

(B) Days to first open flower in a group of selected accessions.

(C) Days to bolting in a group of selected accessions, in same order as S2B.

(D) Correlation between days to opening of first flower and days to bolting in LD conditions. Blue lines shown are linear regression model;  $R^2$  and  $p$ -values from linear regression analysis displayed in upper right corner of each panel.

(E) Rosette leaf number in a group of selected accessions, in same order as S2B.

(F) Correlation between rosette leaf number and days to opening of first flower. Blue lines shown are linear regression model;  $R^2$  and  $p$ -values from linear regression analysis displayed in upper right corner of each panel.

Figure S3

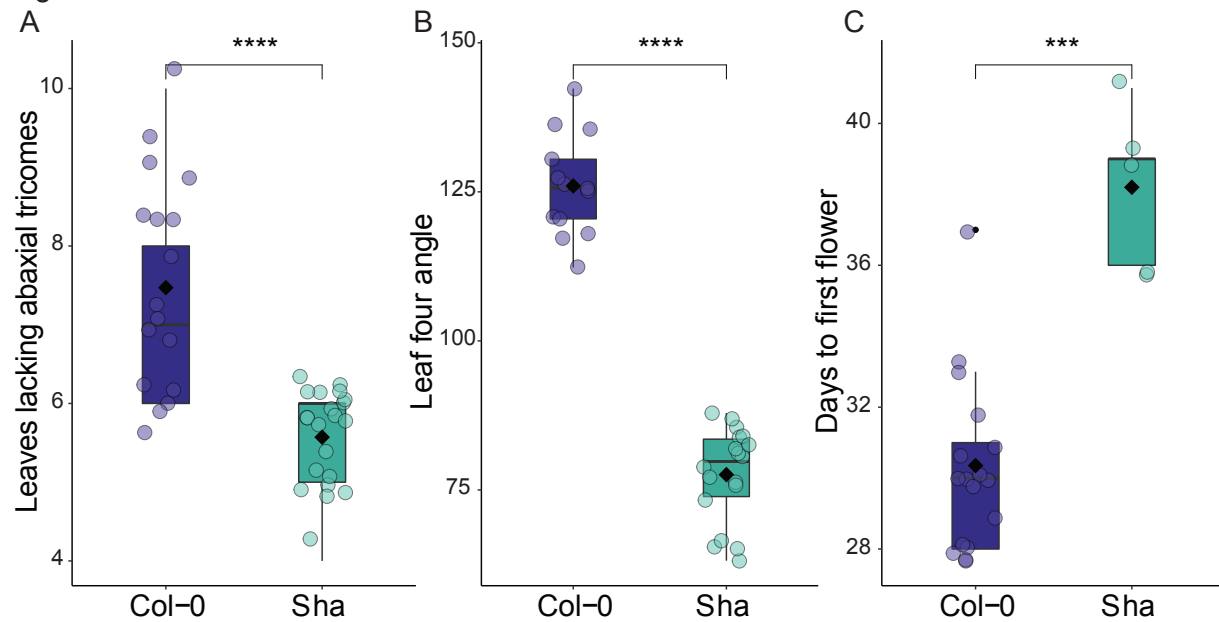

**Fig. S3. Timing of vegetative phase change of Sha and Col-0 in non-vernalized conditions.**

(A-D) The number of leaves lacking abaxial trichomes (A), leaf four base angle (B), and days to first open flower (C) in non-vernalized LD conditions. Significance was determined by two-tailed Student's *t*-test (\*\* $p < 0.001$ , \*\*\*\* $p < 0.0001$ ).

Blue/green dots indicate biological replicates; black dot indicate outliers; center line marks the median value; boxes outline the first and third quartiles, whiskers mark minimum and maximum values.

Figure S4

A

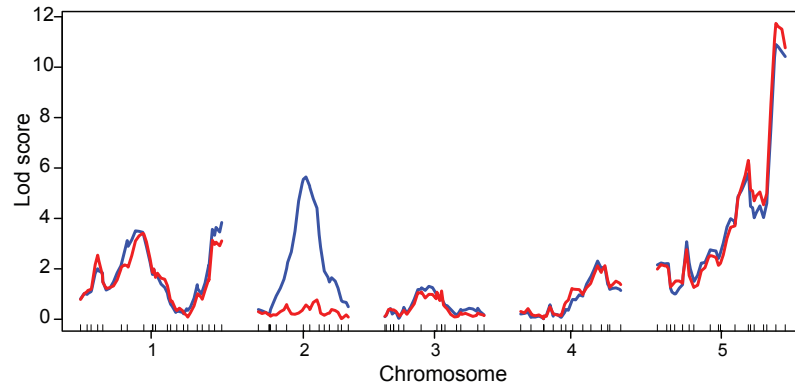

B

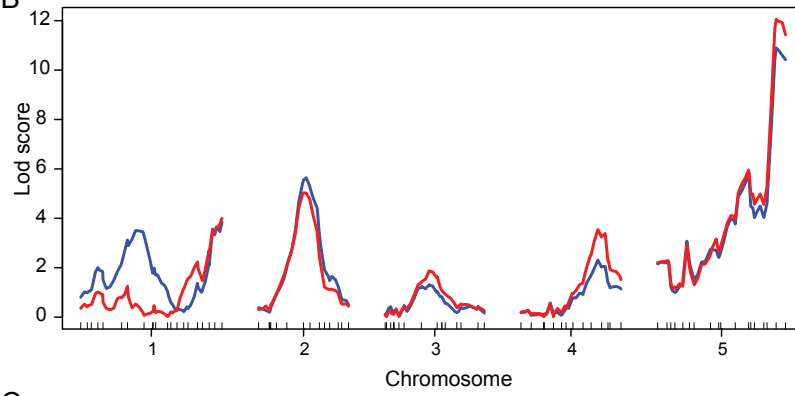

C

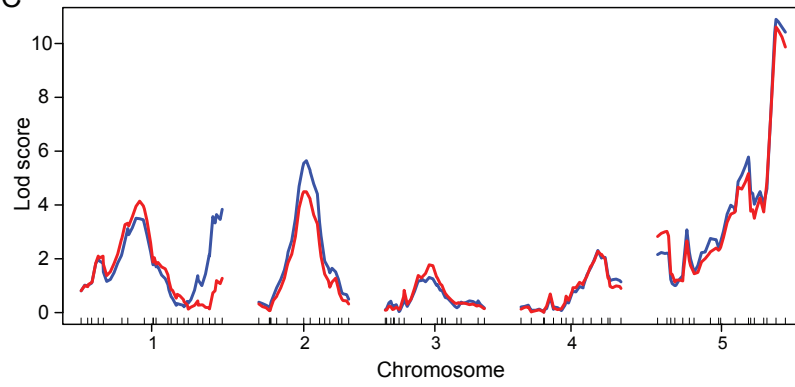

**Fig. S4. Covariate analysis of leaves lacking abaxial trichomes and QTLs in Sha X Col-0 RILs.**

(A) Covariate analysis using the peak coordinate of the QTL on chromosome two. Red lines are LOD scores based on leaves lacking abaxial trichomes using maximum likelihood via the EM algorithm. Blue lines are the LOD score based on a genome scan for number of leaves lacking abaxial trichomes with the effects of each QTL peak on chromosome five incorporated as an interacting covariate.

(B-C) Covariate analysis using the peak coordinates of the QTLs on chromosome one. Red lines are LOD scores based on leaves lacking abaxial trichomes using maximum likelihood via the EM algorithm. Blue lines are the LOD score based on a genome scan for number of leaves lacking abaxial trichomes with the effects of each QTL peak on chromosome five incorporated as an interacting covariate.

**Table S1. Catalog numbers and phenotypic data of natural accessions used in this study**

[Click here to download Table S1](#)

**Table S2. Phenotypic and genotypic data of RIL lines used in this study**

[Click here to download Table S2](#)

**Table S3. Primers used in this study**

| smRNA RT-qPCR      |                              |                                                         |
|--------------------|------------------------------|---------------------------------------------------------|
| Name               | Use                          | Sequence (5'-3')                                        |
| <b>miR156 RT</b>   | miR156 reverse transcription | GTCGTATCCAGTGCAGGGTCCGAGGTATTTCGCACTGGA<br>TACGACGTGCTC |
| <b>miR172 RT</b>   | miR172 reverse transcription | GTCGTATCCAGTGCAGGGTCCGAGGTATTTCGCACTGGA<br>TACGACATGCAG |
| <b>miR156 F</b>    | miR156 qPCR                  | GCGGCGGTGACAGAAGAGAGT                                   |
| <b>miR172 F</b>    | miR172 qPCR                  | CGGCGGAGAATCTTGATGATGC                                  |
| <b>Universal R</b> | miRNA qPCR                   | GTGCAGGGTCCGAGGT                                        |
| <b>SnoR101 F</b>   | SnoR101 qPCR                 | CTTCACAGGTAAGTTCGCTTG                                   |
| <b>SnoR101 R</b>   | SnoR101 RT and qPCR          | AGCATCAGCAGACCAGTAGTT                                   |
| mRNA RT-qPCR       |                              |                                                         |
| Name               | Use                          | Sequence (5'-3')                                        |
| <b>oligo dT</b>    | Reverse transcription        | TTTTTTTTTTTTTTTTTTTTTTTT                                |
| <b>ACT2-F</b>      | qPCR                         | GCACCTGTCTTCTTACCG                                      |
| <b>ACT2-R</b>      | qPCR                         | AACCCTCGTAGATTGGCACA                                    |
| <b>SPL2-F</b>      | qPCR                         | TTTCCGATACCGAGCACAATAG                                  |
| <b>SPL2-F</b>      | qPCR                         | TACGGGTTGGAGGTTGCTTGAGG                                 |
| <b>SPL3-F</b>      | qPCR                         | ATGAGTATGAGAAGAAGCAAAGCG                                |
| <b>SPL3-R</b>      | qPCR                         | TCCACTACTACTTGTAGCTTTACCT                               |
| <b>SPL9-F</b>      | qPCR                         | GGAATTTGACCTAGAGAAAAGGAGTT                              |
| <b>SPL9-R</b>      | qPCR                         | GCATCACCATTTTCGTAAAGCGAAG                               |
| <b>SPL10-F</b>     | qPCR                         | CAGACAAAGGTGTGGGAGAATGCTC                               |
| <b>SPL10-R</b>     | qPCR                         | TAGGGAAAGTGCCAAATATTGGCG                                |
| <b>SPL13-F</b>     | qPCR                         | GGGTTTTCAAGGTAGCAAATTGCT                                |
| <b>SPL13-R</b>     | qPCR                         | ACCAACAACATAGCTCTGGCTCTG                                |
| <b>SPL11-F</b>     | qPCR                         | AGTCCAAGTTTCAACTTCATGGCG                                |
| <b>SPL11-F</b>     | qPCR                         | GAACAGAGTAGAGAAAATGGCTGC                                |
| <b>SPL15-F</b>     | qPCR                         | TGAATGTTTTATCACATGGAAGCTC                               |
| <b>SPL15-R</b>     | qPCR                         | TCATCGAGTCGAAACCAGAAGATG                                |
| <b>miR156C-F</b>   | qPCR                         | AAAAGCCTCAGATCTAACTCCAACAC                              |
| <b>miR156C-R</b>   | qPCR                         | GCGTTTCTCTTAAAATTTGTCCCAAAACT                           |
| <b>miR156A-F</b>   | qPCR                         | CTTCGTTCTCTATGTCTCAATCTCTC                              |
| <b>miR156A-R</b>   | qPCR                         | TGATTAAAGGCTAAAGGTCTCCTC                                |
| <b>TOE1-F</b>      | qPCR                         | CGAGTTATAATAATCCCGCCGAG                                 |
| <b>TOE1-R</b>      | qPCR                         | TTAAGGGTGTGGATAAAAGT                                    |
| <b>TOE2-F</b>      | qPCR                         | ATGGAGAACCACATGGCTGC                                    |
| <b>TOE2-R</b>      | qPCR                         | GGTGCTGTAGCTGCTACGGC                                    |
| <b>TOE3-F</b>      | qPCR                         | CTCACCCGATCATCACGAAG                                    |
| <b>TOE3-R</b>      | qPCR                         | TATTGAAACCGGACCAACGA                                    |

**Table S4. DESeq and SNPEff results for Sha QTLs**

Click here to download Table S4
